# Supplementary material for: A Smartphone Application for Personalized Tooth Shade Determination
Source: MDPI journal article supplement (doi:10.3390/diagnostics13111969), 2023-06-05
Supplement: s1 [file s1]

# A Smartphone Application for Personalized Tooth Shade Determination

Tomoya Kusayanagi <sup>1,†</sup>, Sota Maegawa <sup>1</sup>, Shuya Terauchi <sup>1</sup>, Wataru Hashimoto <sup>1</sup> and Shohei Kaneda <sup>1,†,\*</sup>

<sup>1</sup> Mechanical Engineering Program, Graduate School of Engineering, Kogakuin University, 1-24-2 Nishi-Shinjuku, Shinjuku-ku, 163-8677 Tokyo;

<sup>†</sup> These authors contributed equally to this work.

\* Correspondence: kaneda@cc.kogakuin.ac.jp (S.K.);

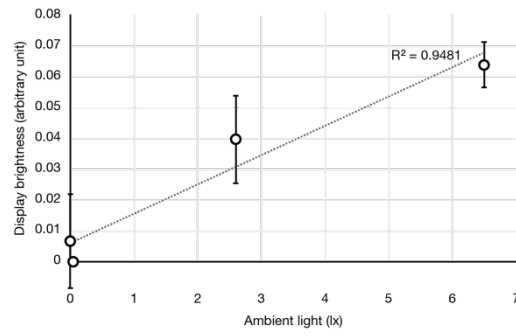

**Figure S1.** Correlation between the display brightness and ambient light. Error bars indicate SD.  $n = 5$ .

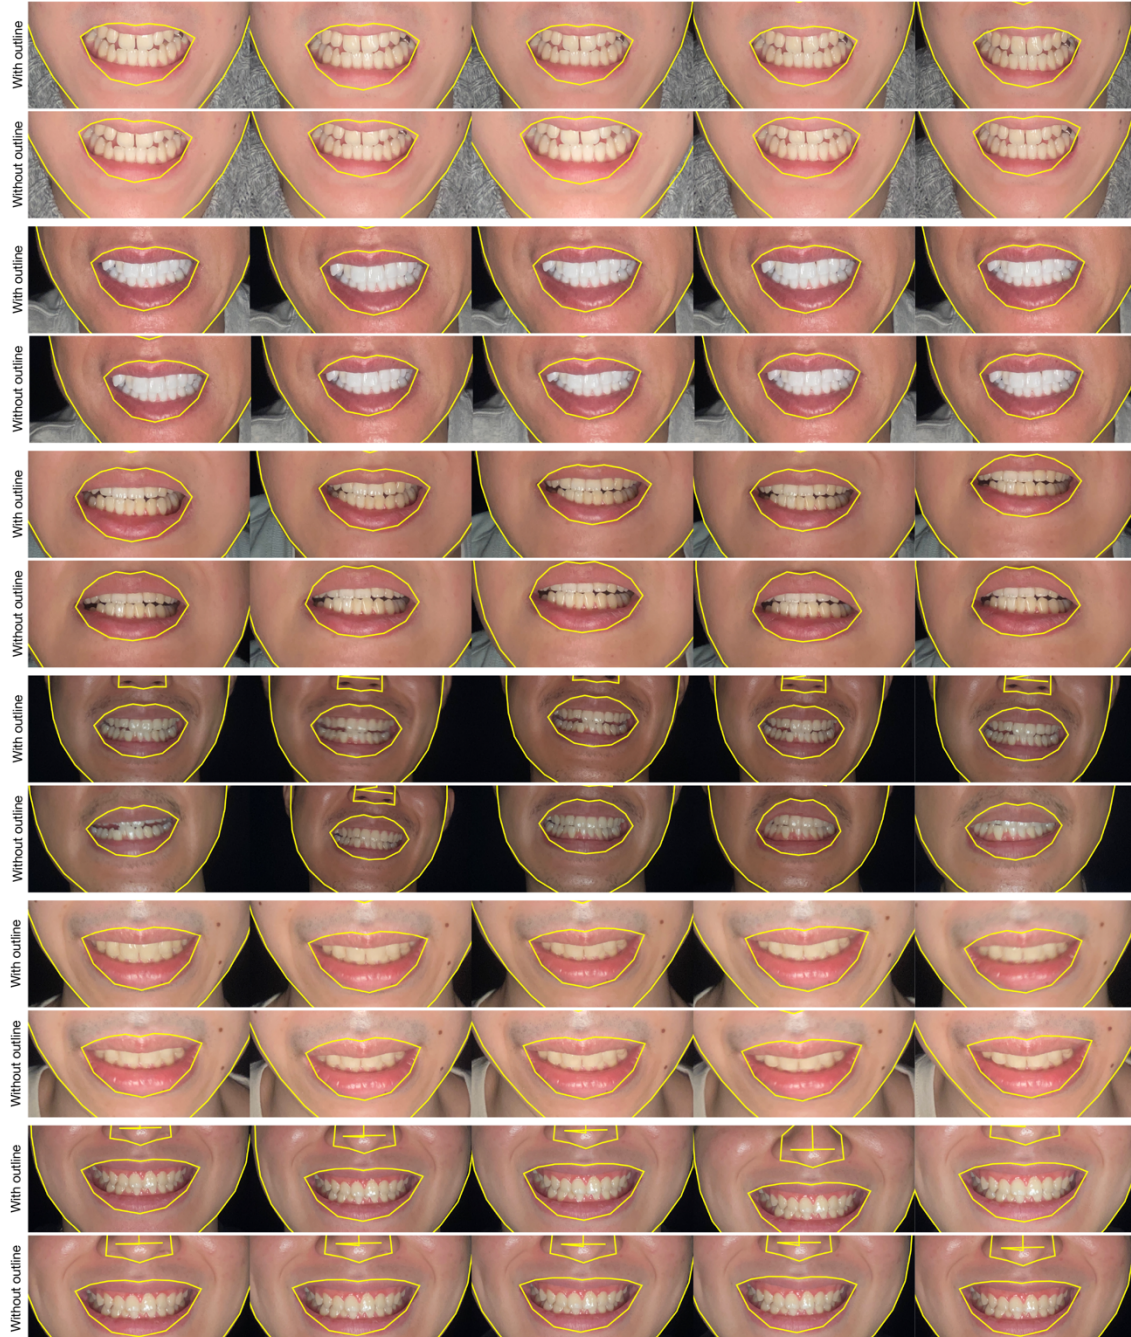

**Figure S2.** Cropped images of mouth from dental photographs of the six participants.

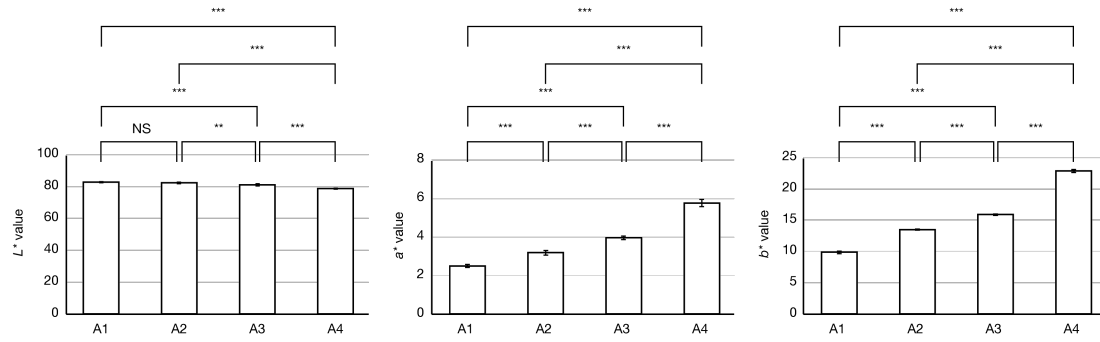

**Figure S3.** Color measurements of the shade tabs at fixed camera tab distance of 20 cm under 0 lx lighting. (Left)  $L^*$  value, (Middle)  $a^*$  value, (Right)  $b^*$  value. NS, not significant; \*,  $P < 0.05$ , \*\*,  $P < 0.01$ , \*\*\*,  $P < 0.001$ ;  $n = 5$ .

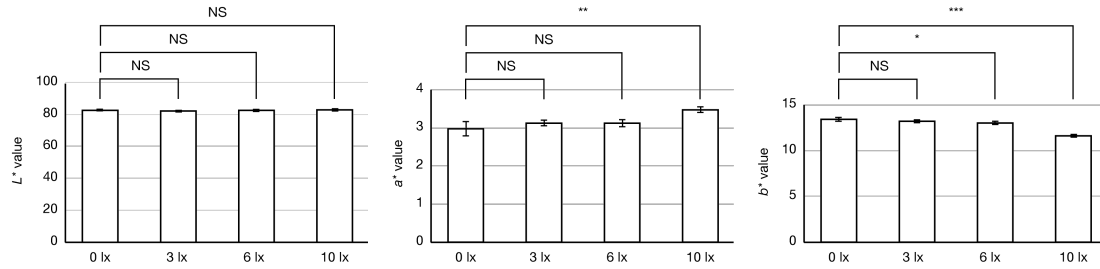

**Figure S4.** Color measurements of the A2 tabs at fixed camera tab distance of 20 cm under various illumination conditions. (Left)  $L^*$  value, (Middle)  $a^*$  value, (Right)  $b^*$  value. NS, not significant; \*,  $P < 0.05$ , \*\*,  $P < 0.01$ , \*\*\*,  $P < 0.001$ ;  $n = 5$ .

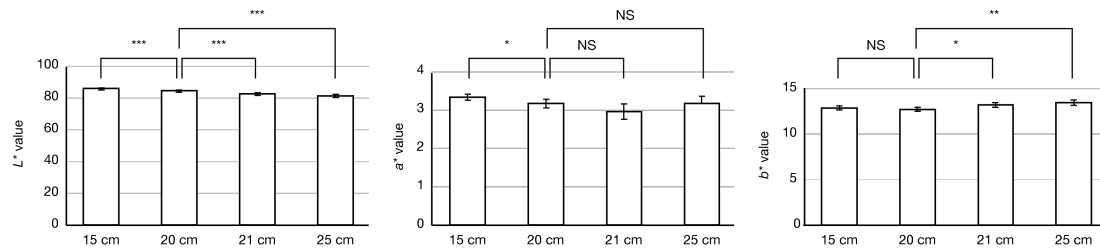

**Figure S5.** Color measurements of the A2 tabs at various camera tab distance under 0 lx lighting. (Left)  $L^*$  value, (Middle)  $a^*$  value, (Right)  $b^*$  value. NS, not significant; \*,  $P < 0.05$ , \*\*,  $P < 0.01$ , \*\*\*,  $P < 0.001$ ;  $n = 5$ .

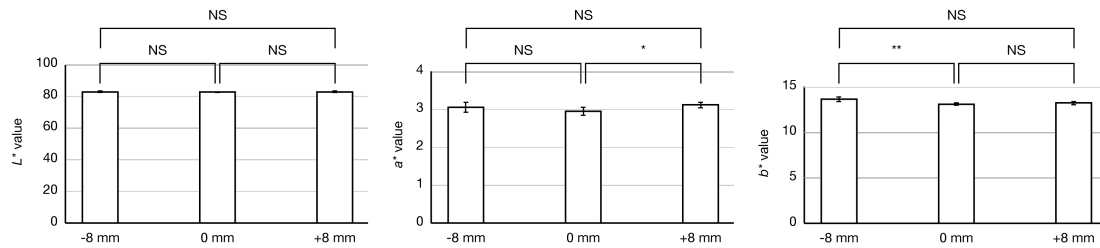

**Figure S6.** Color measurements of the A2 tabs at fixed camera tab distance of 20 cm with  $\pm 8$  mm-horizontal displacement under 0 lx lighting. (Left)  $L^*$  value, (Middle)  $a^*$  value, (Right)  $b^*$  value. NS, not significant; \*,  $P < 0.05$ , \*\*,  $P < 0.01$ , \*\*\*,  $P < 0.001$ ;  $n = 5$ .

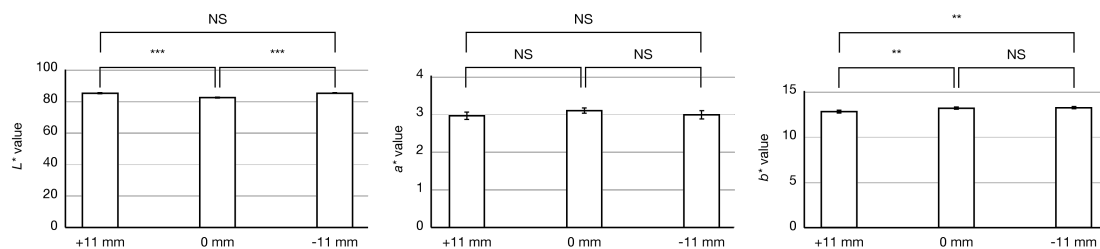

**Figure S7.** Color measurements of the A2 tabs at fixed camera tab distance of 20 cm with  $\pm 11$  mm-vertical displacement under 0 lx lighting. (Left)  $L^*$  value, (Middle)  $a^*$  value, (Right)  $b^*$  value. NS, not significant; \*,  $P < 0.05$ , \*\*,  $P < 0.01$ , \*\*\*,  $P < 0.001$ ;  $n = 5$ .

**Table S1.** Color difference between shade tabs obtained at fixed camera tab distance of 20 cm under 0 lx lighting.

| $\Delta E_{ab}$ | A1   | A2   | A3  | A4   |
|-----------------|------|------|-----|------|
| A1              | –    | 3.7  | 6.5 | 14.0 |
| A2              | 3.7  | –    | 2.8 | 10.3 |
| A3              | 6.5  | 2.8  | –   | 7.5  |
| A4              | 14.0 | 10.3 | 7.5 | –    |

**Video S1:** The movie demonstrates how to capture dental photographs.

**Video S2:** The movie shows a failure to activate the camera due to insufficient darkness in the ambient light.

**Video S3:** The movie shows a failure to save photographs due to a lack of uniformity in tooth appearance for tooth position.

**Video S4:** The movie shows a failure to save photographs due to a lack of uniformity in tooth appearance for tooth area.
