# Supplementary material for: A Smartphone Application for Personalized Tooth Shade Determination
Source: Diagnostics (Basel). 2023 Jun 5;13(11):1969. doi: 10.3390/diagnostics13111969 (PMC10252511; doi:10.3390/diagnostics13111969)
Supplement: Supplementary file 1 [file diagnostics-13-01969-s001.zip]

Archive with 5 entries (5 files):
- diagnostics-2384000-Supplementary.pdf
- VideoS1.mp4
- VideoS2.mp4
- VideoS3.mp4
- VideoS4.mp4
